# Supplementary material
Source: PubMed Central journal article supplement (PMC2749121)

Supplemental Figure S2

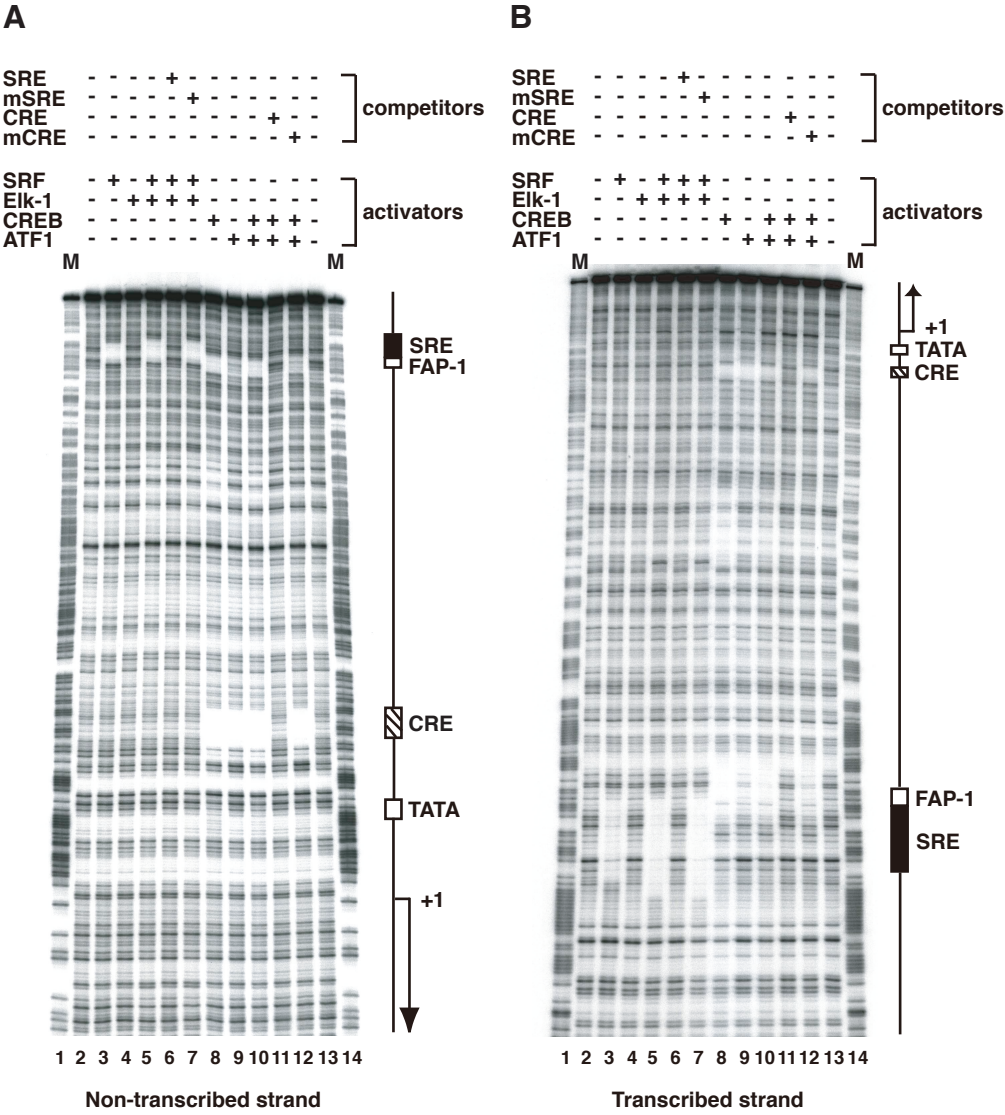

Supplement: supp_M109.013656_jbc.M109.013656-2.pdf [file supp_M109.013656_jbc.M109.013656-2.pdf]

Supplemental Figure S3

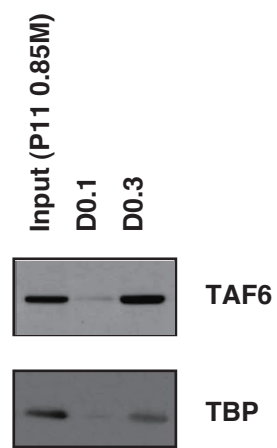

Supplement: supp_M109.013656_jbc.M109.013656-3.pdf [file supp_M109.013656_jbc.M109.013656-3.pdf]

### Supplemental Figure S4

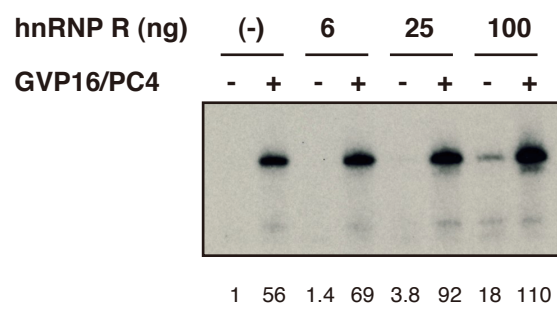

Supplement: supp_M109.013656_jbc.M109.013656-4.pdf [file supp_M109.013656_jbc.M109.013656-4.pdf]
